# Supplementary material
Source: Springer Nature journal article supplement (https://www.springermedizin.de/resource/supplementary/12967_2011_855_MOESM4_ESM.pdf/9577198)

**A**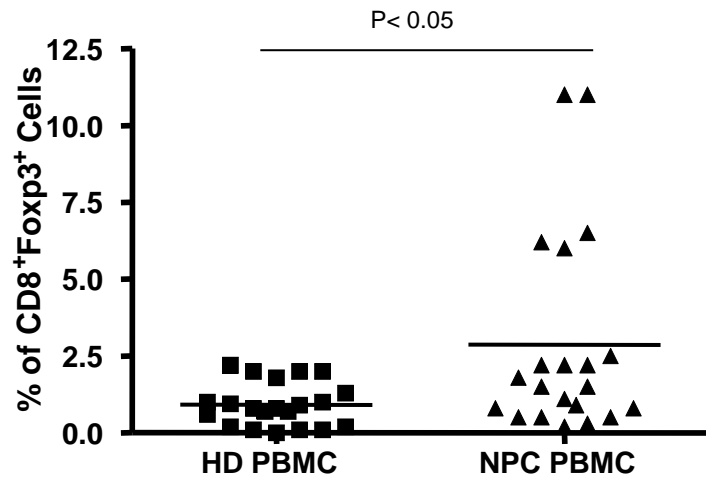**B**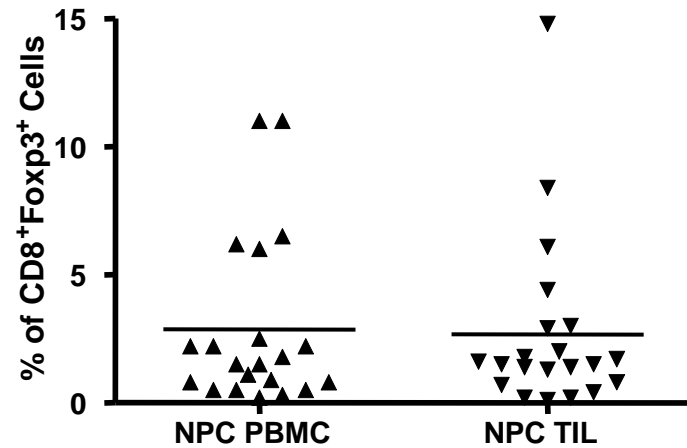**C**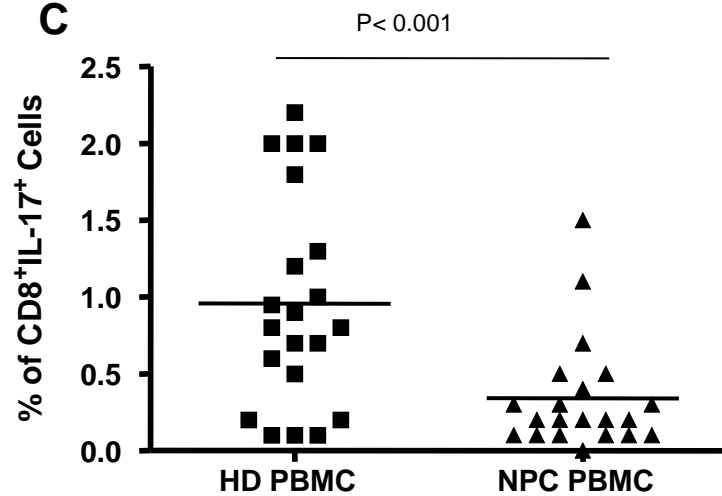**D**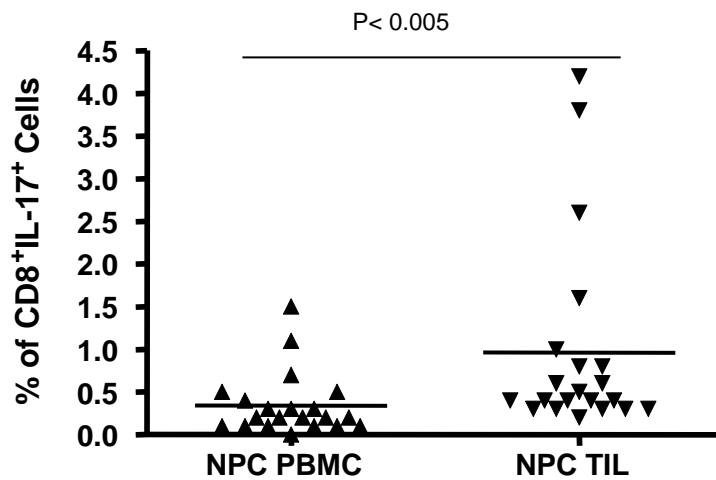

Supplement: MOESM4 [file 9577198]
